# Supplementary material for: Application of ionomics to plant and soil in fields under long-term fertilizer trials
Source: PubMed Central journal article supplement (PMC4684559; doi:10.1186/s40064-015-1562-x), 2015-12-18
Supplement: 40064_2015_1562_MOESM1_ESM.pdf [file 40064_2015_1562_MOESM1_ESM.pdf]

Table S1 Cultivation history of the field used in this study.

---

|           |                                                                                    |
|-----------|------------------------------------------------------------------------------------|
| 1914-1935 | Flax, Oat, Soybean, Sugar beet                                                     |
| 1936-1965 | No cultivation data                                                                |
| 1966-1972 | Alfalfa, Ladino Clover, Orchardgrass, Timothy                                      |
| 1973-1974 | Maize                                                                              |
| 1975      | Maize, Soybean, Tomato                                                             |
| 1976-1977 | No cultivation data                                                                |
| 1978-1981 | Maize, Potato, Soybean, Sugar beet                                                 |
| 1982      | Soybean                                                                            |
| 1983      | Maize                                                                              |
| 1984      | No planting                                                                        |
| 1985      | Maize                                                                              |
| 1986      | Potato                                                                             |
| 1987      | Potato, Maize, Sweet potato                                                        |
| 1988      | Potato, Maize, Wheat, Soybean                                                      |
| 1989      | Potato, Sweet potato                                                               |
| 1990      | Sweet potato                                                                       |
| 1991      | No cultivation data                                                                |
| 1992      | Maize                                                                              |
| 1993      | Maize, Soybean, Wheat                                                              |
| 1994      | No cultivation data                                                                |
| 1995      | Amaranthus, Jerusalem artichoke, Maize, Soybean,<br>Sunflower, Sweet Potato, Wheat |
| 1996      | No cultivation data                                                                |
| 1997-1998 | Oat                                                                                |
| 1999      | Adzuki bean                                                                        |
| 2000      | Oat                                                                                |
| 2001      | Amaranthus, Common reed, Kenaf, Poplar, Zucchini                                   |
| 2002      | White lupin                                                                        |
| 2003-2004 | Maize, Sugar beet, Wheat, White lupin                                              |
| 2005      | Maize, Soybean                                                                     |
| 2006      | Soybean                                                                            |
| 2007      | Sunflower                                                                          |
| 2008      | Soybean                                                                            |
| 2009      | Maize                                                                              |

---

Table S2 Concentration of each element in soils with different fertilizer treatment, determined by different method.

0.1 M HCl extract

|      | P<br>( $\mu\text{g g}^{-1}$ ) | K<br>( $\mu\text{g g}^{-1}$ ) | Ca<br>( $\mu\text{g g}^{-1}$ ) | Mg<br>( $\mu\text{g g}^{-1}$ ) | Fe<br>( $\mu\text{g g}^{-1}$ ) | Mn<br>( $\mu\text{g g}^{-1}$ ) | Zn<br>( $\mu\text{g g}^{-1}$ ) | Cu<br>( $\mu\text{g g}^{-1}$ ) | Mo<br>( $\mu\text{g g}^{-1}$ ) | B<br>( $\mu\text{g g}^{-1}$ ) | Li<br>( $\mu\text{g g}^{-1}$ ) | Na<br>( $\mu\text{g g}^{-1}$ ) | Al<br>( $\mu\text{g g}^{-1}$ ) | Cr<br>( $\mu\text{g g}^{-1}$ ) | Co<br>( $\mu\text{g g}^{-1}$ ) | Ni<br>( $\mu\text{g g}^{-1}$ ) | As<br>( $\mu\text{g g}^{-1}$ ) | Cd<br>( $\mu\text{g g}^{-1}$ ) | Sr<br>( $\mu\text{g g}^{-1}$ ) | Ba<br>( $\mu\text{g g}^{-1}$ ) |
|------|-------------------------------|-------------------------------|--------------------------------|--------------------------------|--------------------------------|--------------------------------|--------------------------------|--------------------------------|--------------------------------|-------------------------------|--------------------------------|--------------------------------|--------------------------------|--------------------------------|--------------------------------|--------------------------------|--------------------------------|--------------------------------|--------------------------------|--------------------------------|
| +NPK | 273 ± 5                       | 175 ± 3                       | 3243 ± 31                      | 183 ± 3                        | 15.6 ± 0.3                     | 41.5 ± 0.6                     | 13.9 ± 0.2                     | 1.037 ± 0.030                  | 0.210 ± 0.009                  | 0.342 ± 0.022                 | 0.061 ± 0.006                  | 36.0 ± 0.1                     | 1357 ± 20                      | 0.084 ± 0.008                  | 0.175 ± 0.004                  | 1.213 ± 0.047                  | 4.38 ± 0.13                    | 0.465 ± 0.003                  | 13.8 ± 0.3                     | 33.4 ± 2.5                     |
| -N   | 223 ± 10                      | 348 ± 19                      | 3470 ± 16                      | 238 ± 1                        | 16.8 ± 2.2                     | 34.5 ± 1.1                     | 15.4 ± 0.6                     | 0.698 ± 0.030                  | 0.168 ± 0.015                  | 0.463 ± 0.024                 | 0.053 ± 0.005                  | 33.6 ± 0.9                     | 1048 ± 12                      | 0.116 ± 0.004                  | 0.199 ± 0.015                  | 0.820 ± 0.032                  | 3.34 ± 0.05                    | 0.412 ± 0.019                  | 22.5 ± 0.1                     | 47.4 ± 0.3                     |
| -P   | 5 ± 0                         | 307 ± 7                       | 2727 ± 35                      | 223 ± 6                        | 19.2 ± 2.0                     | 40.4 ± 2.8                     | 11.9 ± 0.4                     | 1.005 ± 0.048                  | 0.146 ± 0.022                  | 0.287 ± 0.015                 | 0.065 ± 0.003                  | 28.0 ± 0.8                     | 900 ± 25                       | 0.032 ± 0.005                  | 0.242 ± 0.022                  | 0.751 ± 0.030                  | 2.36 ± 0.06                    | 0.268 ± 0.007                  | 12.6 ± 0.3                     | 38.8 ± 3.6                     |
| -K   | 313 ± 2                       | 46 ± 1                        | 3416 ± 23                      | 164 ± 2                        | 13.6 ± 0.5                     | 43.8 ± 1.1                     | 13.9 ± 0.1                     | 0.528 ± 0.044                  | 0.237 ± 0.008                  | 0.377 ± 0.025                 | 0.060 ± 0.002                  | 47.0 ± 0.6                     | 1444 ± 14                      | 0.133 ± 0.012                  | 0.173 ± 0.006                  | 1.108 ± 0.023                  | 4.29 ± 0.01                    | 0.529 ± 0.004                  | 16.6 ± 0.1                     | 40.7 ± 2.3                     |
| -NPK | 4 ± 0                         | 57 ± 1                        | 3345 ± 5                       | 441 ± 2                        | 6.4 ± 0.3                      | 28.2 ± 0.5                     | 10.0 ± 0.2                     | 0.896 ± 0.014                  | 0.086 ± 0.021                  | 0.540 ± 0.014                 | 0.040 ± 0.009                  | 54.8 ± 0.7                     | 632 ± 6                        | 0.027 ± 0.005                  | 0.144 ± 0.008                  | 0.675 ± 0.006                  | 1.90 ± 0.06                    | 0.280 ± 0.004                  | 24.7 ± 0.3                     | 43.9 ± 0.3                     |

1.0 M HCl extract

|      | P<br>( $\mu\text{g g}^{-1}$ ) | K<br>( $\mu\text{g g}^{-1}$ ) | Ca<br>( $\mu\text{g g}^{-1}$ ) | Mg<br>( $\mu\text{g g}^{-1}$ ) | Fe<br>( $\mu\text{g g}^{-1}$ ) | Mn<br>( $\mu\text{g g}^{-1}$ ) | Zn<br>( $\mu\text{g g}^{-1}$ ) | Cu<br>( $\mu\text{g g}^{-1}$ ) | Mo<br>( $\mu\text{g g}^{-1}$ ) | B<br>( $\mu\text{g g}^{-1}$ ) | Li<br>( $\mu\text{g g}^{-1}$ ) | Na<br>( $\mu\text{g g}^{-1}$ ) | Al<br>( $\mu\text{g g}^{-1}$ ) | Cr<br>( $\mu\text{g g}^{-1}$ ) | Co<br>( $\mu\text{g g}^{-1}$ ) | Ni<br>( $\mu\text{g g}^{-1}$ ) | As<br>( $\mu\text{g g}^{-1}$ ) | Cd<br>( $\mu\text{g g}^{-1}$ ) | Sr<br>( $\mu\text{g g}^{-1}$ ) | Ba<br>( $\mu\text{g g}^{-1}$ ) |
|------|-------------------------------|-------------------------------|--------------------------------|--------------------------------|--------------------------------|--------------------------------|--------------------------------|--------------------------------|--------------------------------|-------------------------------|--------------------------------|--------------------------------|--------------------------------|--------------------------------|--------------------------------|--------------------------------|--------------------------------|--------------------------------|--------------------------------|--------------------------------|
| +NPK | 1084 ± 22                     | 149 ± 5                       | 5461 ± 185                     | 509 ± 15                       | 3212 ± 99                      | 207 ± 4                        | 24.8 ± 0.6                     | 10.7 ± 0.4                     | 0.755 ± 0.022                  | 6.75 ± 0.19                   | 0.191 ± 0.007                  | 36.3 ± 0.2                     | 3348 ± 24                      | 1.193 ± 0.012                  | 1.716 ± 0.033                  | 2.700 ± 0.050                  | 20.4 ± 0.4                     | 0.773 ± 0.016                  | 16.3 ± 0.1                     | 69.7 ± 0.7                     |
| -N   | 1004 ± 24                     | 293 ± 15                      | 6872 ± 101                     | 515 ± 6                        | 3534 ± 86                      | 174 ± 4                        | 25.8 ± 0.7                     | 9.7 ± 0.2                      | 0.672 ± 0.018                  | 6.92 ± 0.05                   | 0.182 ± 0.003                  | 33.3 ± 1.1                     | 3084 ± 17                      | 1.428 ± 0.050                  | 1.618 ± 0.026                  | 1.834 ± 0.085                  | 19.0 ± 0.1                     | 0.716 ± 0.022                  | 26.7 ± 0.1                     | 75.4 ± 0.6                     |
| -P   | 93 ± 3                        | 250 ± 9                       | 4056 ± 148                     | 466 ± 8                        | 2253 ± 54                      | 135 ± 5                        | 21.5 ± 0.5                     | 8.5 ± 0.2                      | 0.860 ± 0.004                  | 4.37 ± 0.13                   | 0.147 ± 0.011                  | 27.0 ± 0.6                     | 2788 ± 10                      | 0.354 ± 0.014                  | 1.118 ± 0.038                  | 1.516 ± 0.033                  | 11.9 ± 0.1                     | 0.429 ± 0.005                  | 15.4 ± 0.2                     | 66.3 ± 1.5                     |
| -K   | 1271 ± 11                     | 45 ± 0                        | 6519 ± 127                     | 536 ± 2                        | 3290 ± 2                       | 222 ± 1                        | 26.6 ± 0.2                     | 11.3 ± 0.1                     | 0.769 ± 0.026                  | 6.30 ± 0.02                   | 0.242 ± 0.001                  | 53.0 ± 3.4                     | 3477 ± 10                      | 1.213 ± 0.014                  | 1.922 ± 0.018                  | 2.387 ± 0.008                  | 20.8 ± 0.0                     | 0.826 ± 0.008                  | 20.4 ± 0.1                     | 77.9 ± 0.2                     |
| -NPK | 111 ± 4                       | 53 ± 1                        | 6241 ± 28                      | 797 ± 2                        | 2426 ± 14                      | 144 ± 3                        | 17.9 ± 0.3                     | 12.0 ± 0.1                     | 0.508 ± 0.013                  | 4.86 ± 0.03                   | 0.184 ± 0.001                  | 54.3 ± 1.1                     | 2641 ± 3                       | 0.465 ± 0.007                  | 1.260 ± 0.023                  | 1.418 ± 0.015                  | 12.8 ± 0.0                     | 0.479 ± 0.008                  | 29.3 ± 0.4                     | 68.0 ± 0.4                     |

Water extract

|      | P<br>( $\mu\text{g g}^{-1}$ ) | K<br>( $\mu\text{g g}^{-1}$ ) | Ca<br>( $\mu\text{g g}^{-1}$ ) | Mg<br>( $\mu\text{g g}^{-1}$ ) | Fe<br>( $\mu\text{g g}^{-1}$ ) | Mn<br>( $\mu\text{g g}^{-1}$ ) | Zn<br>( $\mu\text{g g}^{-1}$ ) | Cu<br>( $\mu\text{g g}^{-1}$ ) | Mo<br>( $\mu\text{g g}^{-1}$ ) | B<br>( $\mu\text{g g}^{-1}$ ) | Li<br>( $\mu\text{g g}^{-1}$ ) | Na<br>( $\mu\text{g g}^{-1}$ ) | Al<br>( $\mu\text{g g}^{-1}$ ) | Cr<br>( $\mu\text{g g}^{-1}$ ) | Co<br>( $\mu\text{g g}^{-1}$ ) | Ni<br>( $\mu\text{g g}^{-1}$ ) | As<br>( $\mu\text{g g}^{-1}$ ) | Cd<br>( $\mu\text{g g}^{-1}$ ) | Sr<br>( $\mu\text{g g}^{-1}$ ) | Ba<br>( $\mu\text{g g}^{-1}$ ) | Cs<br>( $\mu\text{g g}^{-1}$ ) |
|------|-------------------------------|-------------------------------|--------------------------------|--------------------------------|--------------------------------|--------------------------------|--------------------------------|--------------------------------|--------------------------------|-------------------------------|--------------------------------|--------------------------------|--------------------------------|--------------------------------|--------------------------------|--------------------------------|--------------------------------|--------------------------------|--------------------------------|--------------------------------|--------------------------------|
| +NPK | 3.29 ± 0.33                   | 19.2 ± 1.5                    | 72.1 ± 7.8                     | 5.58 ± 0.56                    | 536 ± 96                       | 465 ± 80                       | 73.1 ± 10.5                    | 21.2 ± 2.4                     | ND                             | 179 ± 26                      | 8.65 ± 1.25                    | 14.0 ± 0.2                     | 1.54 ± 0.63                    | 8.34 ± 0.69                    | 1.64 ± 0.15                    | 14.3 ± 0.9                     | 13.9 ± 1.4                     | 0.570 ± 0.081                  | 219 ± 25                       | 86.0 ± 7.2                     | 3.05 ± 0.19                    |
| -N   | 4.67 ± 0.81                   | 35.7 ± 7.5                    | 52.4 ± 7.1                     | 4.88 ± 0.59                    | 599 ± 58                       | 153 ± 18                       | 30.5 ± 2.3                     | 20.2 ± 0.7                     | ND                             | 229 ± 35                      | 3.75 ± 0.37                    | 12.4 ± 0.9                     | 0.73 ± 0.43                    | 7.18 ± 0.43                    | 1.03 ± 0.10                    | 11.0 ± 0.5                     | 23.8 ± 2.6                     | 0.200 ± 0.008                  | 221 ± 32                       | 56.7 ± 7.1                     | 1.86 ± 0.14                    |
| -P   | 0.02 ± 0.02                   | 32.0 ± 3.7                    | 39.8 ± 12.5                    | 4.53 ± 1.40                    | 148 ± 12                       | 531 ± 236                      | 57.9 ± 20.0                    | 6.6 ± 0.5                      | ND                             | 137 ± 8                       | 5.93 ± 1.78                    | 9.0 ± 1.4                      | 0.42 ± 0.21                    | 3.17 ± 0.21                    | 2.18 ± 0.84                    | 4.3 ± 0.7                      | 1.8 ± 0.1                      | 0.318 ± 0.130                  | 156 ± 48                       | 83.2 ± 12.0                    | 2.63 ± 0.48                    |
| -K   | 4.50 ± 0.48                   | 8.0 ± 1.9                     | 73.4 ± 9.5                     | 4.49 ± 0.69                    | 590 ± 283                      | 493 ± 109                      | 61.7 ± 11.8                    | 16.0 ± 1.6                     | 0.305 ± 0.305                  | 157 ± 28                      | 7.55 ± 1.01                    | 16.5 ± 1.2                     | 1.75 ± 3.94                    | 5.41 ± 0.66                    | 1.84 ± 0.42                    | 11.8 ± 3.3                     | 16.0 ± 1.0                     | 0.525 ± 0.083                  | 236 ± 31                       | 83.6 ± 8.0                     | 6.87 ± 0.58                    |
| -NPK | 0.22 ± 0.03                   | 4.8 ± 0.2                     | 27.8 ± 0.6                     | 5.49 ± 0.08                    | 73 ± 3                         | 86 ± 3                         | 9.2 ± 1.6                      | 6.8 ± 0.1                      | ND                             | 227 ± 29                      | 0.92 ± 0.04                    | 15.7 ± 0.3                     | 0.09 ± 0.03                    | 3.45 ± 0.22                    | 0.35 ± 0.01                    | 1.7 ± 0.1                      | 1.9 ± 0.0                      | 0.062 ± 0.016                  | 149 ± 3                        | 32.6 ± 0.3                     | 4.39 ± 0.13                    |

HNO<sub>3</sub> digestion

|      | P<br>( $\mu\text{g g}^{-1}$ ) | K<br>( $\mu\text{g g}^{-1}$ ) | Ca<br>( $\mu\text{g g}^{-1}$ ) | Mg<br>( $\mu\text{g g}^{-1}$ ) | Fe<br>( $\mu\text{g g}^{-1}$ ) | Mn<br>( $\mu\text{g g}^{-1}$ ) | Zn<br>( $\mu\text{g g}^{-1}$ ) | Cu<br>( $\mu\text{g g}^{-1}$ ) | Mo<br>( $\mu\text{g g}^{-1}$ ) | B<br>( $\mu\text{g g}^{-1}$ ) | Li<br>( $\mu\text{g g}^{-1}$ ) | Na<br>( $\mu\text{g g}^{-1}$ ) | Al<br>( $\mu\text{g g}^{-1}$ ) | Cr<br>( $\mu\text{g g}^{-1}$ ) | Co<br>( $\mu\text{g g}^{-1}$ ) | Ni<br>( $\mu\text{g g}^{-1}$ ) | As<br>( $\mu\text{g g}^{-1}$ ) | Cd<br>( $\mu\text{g g}^{-1}$ ) | Sr<br>( $\mu\text{g g}^{-1}$ ) | Ba<br>( $\mu\text{g g}^{-1}$ ) | Cs<br>( $\mu\text{g g}^{-1}$ ) |
|------|-------------------------------|-------------------------------|--------------------------------|--------------------------------|--------------------------------|--------------------------------|--------------------------------|--------------------------------|--------------------------------|-------------------------------|--------------------------------|--------------------------------|--------------------------------|--------------------------------|--------------------------------|--------------------------------|--------------------------------|--------------------------------|--------------------------------|--------------------------------|--------------------------------|
| +NPK | 1979 ± 39                     | 1143 ± 15                     | 4917 ± 266                     | 4310 ± 70                      | 27419 ± 401                    | 1325 ± 18                      | 113 ± 1                        | 39.1 ± 0.2                     | 1.973 ± 0.594                  | 5.398 ± 1.815                 | 11.6 ± 0.2                     | 240 ± 18                       | 21343 ± 423                    | 17.1 ± 0.1                     | 14.7 ± 0.2                     | 212 ± 2                        | 49.4 ± 1.2                     | 0.599 ± 0.027                  | 25.6 ± 0.8                     | 106 ± 1                        | 7.08 ± 0.04                    |
| -N   | 1769 ± 109                    | 1554 ± 76                     | 5770 ± 214                     | 4430 ± 38                      | 28428 ± 396                    | 1124 ± 52                      | 112 ± 4                        | 34.6 ± 0.8                     | 0.784 ± 0.024                  | 1.757 ± 0.250                 | 12.8 ± 0.1                     | 274 ± 18                       | 22993 ± 541                    | 16.6 ± 0.4                     | 14.8 ± 0.6                     | 223 ± 1                        | 57.2 ± 1.9                     | 0.514 ± 0.032                  | 38.5 ± 0.7                     | 108 ± 3                        | 6.76 ± 0.24                    |
| -P   | 785 ± 24                      | 1479 ± 25                     | 4465 ± 366                     | 4303 ± 127                     | 28021 ± 342                    | 1166 ± 31                      | 121 ± 7                        | 33.4 ± 0.2                     | 0.636 ± 0.049                  | 0.798 ± 0.119                 | 12.3 ± 0.6                     | 287 ± 44                       | 22601 ± 1271                   | 14.9 ± 0.4                     | 14.6 ± 0.1                     | 214 ± 6                        | 49.3 ± 0.9                     | 0.353 ± 0.011                  | 26.6 ± 0.5                     | 102 ± 2                        | 7.25 ± 0.15                    |
| -K   | 2093 ± 21                     | 943 ± 6                       | 5859 ± 103                     | 4182 ± 129                     | 27132 ± 373                    | 1293 ± 35                      | 121 ± 3                        | 38.9 ± 1.0                     | 1.343 ± 0.384                  | 2.664 ± 1.453                 | 12.2 ± 0.2                     | 340 ± 24                       | 22738 ± 350                    | 18.2 ± 0.6                     | 14.9 ± 0.5                     | 211 ± 5                        | 45.9 ± 0.4                     | 0.680 ± 0.029                  | 31.3 ± 0.4                     | 115 ± 3                        | 7.40 ± 0.07                    |
| -NPK | 757 ± 6                       | 966 ± 31                      | 6039 ± 39                      | 4617 ± 43                      | 27305 ± 103                    | 1259 ± 34                      | 115 ± 2                        | 41.1 ± 0.2                     | 0.827 ± 0.047                  | 0.966 ± 0.086                 | 12.8 ± 0.2                     | 381 ± 18                       | 20974 ± 370                    | 16.0 ± 0.4                     | 15.8 ± 0.3                     | 221 ± 3                        | 46.6 ± 0.6                     | 0.428 ± 0.011                  | 42.8 ± 0.5                     | 106 ± 1                        | 7.28 ± 0.10                    |

Acetic acid extract

|      | P<br>( $\mu\text{g g}^{-1}$ ) | K<br>( $\mu\text{g g}^{-1}$ ) | Ca<br>( $\mu\text{g g}^{-1}$ ) | Mg<br>( $\mu\text{g g}^{-1}$ ) | Fe<br>( $\mu\text{g g}^{-1}$ ) | Mn<br>( $\mu\text{g g}^{-1}$ ) | Zn<br>( $\mu\text{g g}^{-1}$ ) | Cu<br>( $\mu\text{g g}^{-1}$ ) | Mo<br>( $\mu\text{g g}^{-1}$ ) | B<br>( $\mu\text{g g}^{-1}$ ) | Li<br>( $\mu\text{g g}^{-1}$ ) | Na<br>( $\mu\text{g g}^{-1}$ ) | Al<br>( $\mu\text{g g}^{-1}$ ) | Cr<br>( $\mu\text{g g}^{-1}$ ) | Co<br>( $\mu\text{g g}^{-1}$ ) | Ni<br>( $\mu\text{g g}^{-1}$ ) | As<br>( $\mu\text{g g}^{-1}$ ) | Cd<br>( $\mu\text{g g}^{-1}$ ) | Sr<br>( $\mu\text{g g}^{-1}$ ) | Ba<br>( $\mu\text{g g}^{-1}$ ) | Cs<br>( $\mu\text{g g}^{-1}$ ) |
|------|-------------------------------|-------------------------------|--------------------------------|--------------------------------|--------------------------------|--------------------------------|--------------------------------|--------------------------------|--------------------------------|-------------------------------|--------------------------------|--------------------------------|--------------------------------|--------------------------------|--------------------------------|--------------------------------|--------------------------------|--------------------------------|--------------------------------|--------------------------------|--------------------------------|
| +NPK | 23.8 ± 1.7                    | 91 ± 5                        | 1267 ± 44                      | 76 ± 1                         | 2.51 ± 0.14                    | 9.73 ± 1.21                    | 2.59 ± 0.18                    | 43.9 ± 4.2                     | 1.50 ± 1.50                    | 423.2 ± 48.3                  | 50.3 ± 3.3                     | 27.7 ± 0.8                     | 57.4 ± 2.7                     | 26.9 ± 1.8                     | 38.0 ± 4.7                     | 221.2 ± 14.2                   | 64.8 ± 2.7                     | 31.9 ± 0.9                     | 4.31 ± 0.06                    | 3.46 ± 0.47                    | 11.1 ± 1.4                     |
| -N   | 27.0 ± 2.4                    | 187 ± 17                      | 1513 ± 14                      | 102 ± 1                        | 3.06 ± 0.42                    | 5.63 ± 0.22                    | 2.66 ± 0.40                    | 29.5 ± 1.4                     | ND                             | 439.7 ± 32.1                  | 46.1 ± 1.8                     | 26.9 ± 1.4                     | 36.8 ± 1.4                     | 36.2 ± 11.1                    | 29.6 ± 1.3                     | 140.1 ± 6.4                    | 97.2 ± 4.5                     | 26.5 ± 0.6                     | 7.23 ± 0.16                    | 5.69 ± 0.14                    | 6.6 ± 0.7                      |
| -P   | 1.7 ± 0.1                     | 165 ± 7                       | 1055 ± 40                      | 96 ± 4                         | 2.07 ± 0.03                    | 14.12 ± 2.54                   | 2.51 ± 0.17                    | 25.4 ± 5.7                     | ND                             | 297.3 ± 26.8                  | 49.2 ± 5.4                     | 21.6 ± 1.0                     | 26.5 ± 2.0                     | 23.2 ± 3.1                     | 74.4 ± 14.9                    | 158.6 ± 11.1                   | 19.9 ± 2.2                     | 23.6 ± 1.1                     | 4.32 ± 0.14                    | 5.33 ± 1.03                    | 9.7 ± 0.7                      |
| -K   | 28.0 ± 1.2                    | 22 ± 1                        | 1488 ± 31                      | 67 ± 0                         | 2.87 ± 0.06                    | 11.72 ± 1.03                   | 2.44 ± 0.06                    | 30.3 ± 1.8                     | ND                             | 308.3 ± 61.1                  | 52.3 ± 2.7                     | 36.3 ± 0.8                     | 66.7 ± 1.6                     | 30.6 ± 1.7                     | 46.6 ± 5.1                     | 181.5 ± 4.2                    | 65.4 ± 0.6                     | 30.9 ± 0.6                     | 5.20 ± 0.16                    | 4.50 ± 0.56                    | 28.6 ± 0.7                     |
| -NPK | 1.6 ± 0.1                     | 27 ± 0                        | 1478 ± 13                      | 204 ± 1                        | 2.54 ± 0.01                    | 6.62 ± 0.27                    | 1.50 ± 0.03                    | 17.1 ± 1.5                     | ND                             | 516.5 ± 39.4                  | 30.3 ± 0.4                     | 43.6 ± 0.7                     | 10.3 ± 0.1                     | 26.0 ± 1.6                     | 30.3 ± 0.4                     | 87.8 ± 1.2                     | 15.7 ± 0.2                     | 16.2 ± 0.0                     | 8.22 ± 0.09                    | 5.71 ± 0.01                    | 28.2 ± 0.3                     |

Ammonium acetate extract

|      | P<br>( $\mu\text{g g}^{-1}$ ) | K<br>( $\mu\text{g g}^{-1}$ ) | Ca<br>( $\mu\text{g g}^{-1}$ ) | Mg<br>( $\mu\text{g g}^{-1}$ ) | Fe<br>( $\mu\text{g g}^{-1}$ ) | Mn<br>( $\mu\text{g g}^{-1}$ ) | Zn<br>( $\mu\text{g g}^{-1}$ ) | Cu<br>( $\mu\text{g g}^{-1}$ ) | Mo<br>( $\mu\text{g g}^{-1}$ ) | B<br>( $\mu\text{g g}^{-1}$ ) | Li<br>( $\mu\text{g g}^{-1}$ ) | Na<br>( $\mu\text{g g}^{-1}$ ) | Al<br>( $\mu\text{g g}^{-1}$ ) | Cr<br>( $\mu\text{g g}^{-1}$ ) | Co<br>( $\mu\text{g g}^{-1}$ ) | Ni<br>( $\mu\text{g g}^{-1}$ ) | As<br>( $\mu\text{g g}^{-1}$ ) | Cd<br>( $\mu\text{g g}^{-1}$ ) | Sr<br>( $\mu\text{g g}^{-1}$ ) | Ba<br>( $\mu\text{g g}^{-1}$ ) | Cs<br>( $\mu\text{g g}^{-1}$ ) |
|------|-------------------------------|-------------------------------|--------------------------------|--------------------------------|--------------------------------|--------------------------------|--------------------------------|--------------------------------|--------------------------------|-------------------------------|--------------------------------|--------------------------------|--------------------------------|--------------------------------|--------------------------------|--------------------------------|--------------------------------|--------------------------------|--------------------------------|--------------------------------|--------------------------------|
| +NPK | 14.2 ± 3.2                    | 425 ± 18                      | 3431 ± 138                     | 169 ± 4                        | 3.52 ± 0.20                    | 11.52 ± 1.82                   | 0.450 ± 0.088                  | 5 ± 3                          | ND                             | ND                            | 52.9 ± 3.8                     | 42.5 ± 1.5                     | 2.19 ± 0.09                    | 169 ± 102                      | 20.1 ± 2.2                     | 124 ± 6                        | 61.3 ± 1.9                     | 90.6 ± 3.5                     | 12.7 ± 0.2                     | 28.6 ± 1.0                     | 1.30 ± 0.06                    |
| -N   | 12.9 ± 2.0                    | 747 ± 60                      | 4026 ± 69                      | 221 ± 3                        | 3.63 ± 0.08                    | 5.87 ± 0.11                    | 0.375 ± 0.076                  | 16 ± 16                        | ND                             | ND                            | 48.0 ± 3.3                     | 41.9 ± 4.0                     | 0.70 ± 0.03                    | 22 ±                           |                                |                                |                                |                                |                                |                                |                                |

Table S3 Concentration of each element in leaves of maize grown under different fertilizer treatment.

|      | N<br>(mg g <sup>-1</sup> ) | P<br>(mg g <sup>-1</sup> ) | K<br>(mg g <sup>-1</sup> ) | Ca<br>(mg g <sup>-1</sup> ) | Mg<br>(mg g <sup>-1</sup> ) | Fe<br>(µg g <sup>-1</sup> ) | Mn<br>(µg g <sup>-1</sup> ) | Zn<br>(µg g <sup>-1</sup> ) | Cu<br>(µg g <sup>-1</sup> ) | Mo<br>(µg g <sup>-1</sup> ) | B<br>(µg g <sup>-1</sup> ) |
|------|----------------------------|----------------------------|----------------------------|-----------------------------|-----------------------------|-----------------------------|-----------------------------|-----------------------------|-----------------------------|-----------------------------|----------------------------|
| +NPK | 34.2 ± 0.4                 | 3.81 ± 0.21                | 33.3 ± 1.6                 | 4.38 ± 0.35                 | 1.84 ± 0.15                 | 118 ± 13                    | 66.7 ± 7.7                  | 34.4 ± 3.4                  | 11.20 ± 0.81                | 0.19 ± 0.03                 | 3.33 ± 0.07                |
| -N   | 24.8 ± 0.5                 | 2.78 ± 0.05                | 29.1 ± 0.7                 | 3.30 ± 0.16                 | 1.32 ± 0.03                 | 102 ± 13                    | 20.2 ± 1.3                  | 20.8 ± 0.9                  | 7.64 ± 0.52                 | 1.27 ± 0.43                 | 19.84 ± 6.47               |
| -P   | 33.4 ± 1.2                 | 1.43 ± 0.07                | 34.7 ± 0.9                 | 3.64 ± 0.28                 | 1.70 ± 0.09                 | 148 ± 17                    | 48.8 ± 1.3                  | 37.6 ± 2.0                  | 12.27 ± 0.09                | 0.31 ± 0.01                 | 6.35 ± 0.62                |
| -K   | 37.1 ± 0.7                 | 6.24 ± 0.08                | 6.3 ± 0.1                  | 8.20 ± 0.10                 | 6.14 ± 0.09                 | 232 ± 24                    | 83.9 ± 1.8                  | 54.6 ± 1.5                  | 9.84 ± 0.55                 | 0.34 ± 0.01                 | 6.88 ± 0.33                |
| -NPK | 28.8 ± 0.7                 | 2.42 ± 0.22                | 12.1 ± 2.7                 | 4.15 ± 0.20                 | 4.02 ± 0.44                 | 205 ± 32                    | 19.4 ± 1.8                  | 33.5 ± 3.5                  | 13.10 ± 1.39                | 1.40 ± 0.10                 | 4.32 ± 0.14                |

Values are means (n = 3) ± standard errors.

| Li<br>(µg g <sup>-1</sup> ) | Na<br>(µg g <sup>-1</sup> ) | Al<br>(µg g <sup>-1</sup> ) | Cr<br>(µg g <sup>-1</sup> ) | Co<br>(µg g <sup>-1</sup> ) | Ni<br>(µg g <sup>-1</sup> ) | As<br>(µg g <sup>-1</sup> ) | Cd<br>(µg g <sup>-1</sup> ) | Sr<br>(µg g <sup>-1</sup> ) | Ba<br>(µg g <sup>-1</sup> ) | Cs<br>(µg g <sup>-1</sup> ) |
|-----------------------------|-----------------------------|-----------------------------|-----------------------------|-----------------------------|-----------------------------|-----------------------------|-----------------------------|-----------------------------|-----------------------------|-----------------------------|
| 0.066 ± 0.008               | 196 ± 6                     | 39 ± 12                     | 4.43 ± 0.87                 | 0.05 ± 0.02                 | 2.44 ± 0.44                 | 0.155 ± 0.033               | 0.212 ± 0.019               | 11.9 ± 1.0                  | 1.88 ± 0.15                 | 2.99 ± 0.26                 |
| 0.054 ± 0.032               | 194 ± 7                     | 34 ± 7                      | 5.49 ± 0.77                 | 0.08 ± 0.01                 | 2.83 ± 0.33                 | 0.208 ± 0.057               | 0.139 ± 0.023               | 10.6 ± 0.6                  | 1.91 ± 0.14                 | 0.37 ± 0.04                 |
| 0.055 ± 0.007               | 246 ± 17                    | 84 ± 18                     | 8.41 ± 1.51                 | 0.14 ± 0.03                 | 4.95 ± 1.02                 | 0.174 ± 0.030               | 0.177 ± 0.011               | 10.1 ± 1.0                  | 2.93 ± 0.43                 | 0.56 ± 0.11                 |
| 0.108 ± 0.015               | 339 ± 14                    | 154 ± 14                    | 11.29 ± 1.11                | 0.19 ± 0.03                 | 6.29 ± 0.68                 | 0.465 ± 0.028               | 0.272 ± 0.001               | 23.5 ± 0.4                  | 4.89 ± 0.09                 | 9.04 ± 0.12                 |
| 0.127 ± 0.013               | 265 ± 28                    | 139 ± 24                    | 13.29 ± 4.10                | 0.19 ± 0.05                 | 7.11 ± 1.94                 | 0.276 ± 0.049               | 0.087 ± 0.005               | 18.4 ± 1.7                  | 3.18 ± 0.32                 | 8.20 ± 0.21                 |

Table S4 Correlation coefficient between concentrations determined by the methods (i) and (ii).

| (i)                        | (ii)                       | K | Ca | Mg | Fe | Mn | Zn | Cu | B | Mo | Li | Al | Na | Cr | Co | Ni | As | Cd | Sr | Ba | Cs | P |   |  |
|----------------------------|----------------------------|---|----|----|----|----|----|----|---|----|----|----|----|----|----|----|----|----|----|----|----|---|---|--|
| 0.1 M HCl                  | 1 M HCl                    |   |    |    |    |    |    |    |   |    |    |    |    |    |    |    |    |    |    |    |    | x |   |  |
| 0.1 M HCl                  | Water                      |   |    |    |    |    |    |    |   |    |    |    |    |    |    |    |    |    |    |    |    |   | x |  |
| 0.1 M HCl                  | Acetate                    |   |    |    |    |    |    |    |   |    |    |    |    |    |    |    |    |    |    |    |    |   | x |  |
| 0.1 M HCl                  | Ammonium acetate           |   |    |    |    |    |    |    |   |    |    |    |    |    |    |    |    |    |    |    |    |   | x |  |
| 0.1 M HCl                  | HNO <sub>3</sub> digestion |   |    |    |    |    |    |    |   |    |    |    |    |    |    |    |    |    |    |    |    |   | x |  |
| 0.1 M HCl                  | Truog                      | x | x  | x  | x  | x  | x  | x  | x | x  | x  | x  | x  | x  | x  | x  | x  | x  | x  | x  | x  | x | x |  |
| 1 M HCl                    | 0.1 M HCl                  |   |    |    |    |    |    |    |   |    |    |    |    |    |    |    |    |    |    |    |    |   | x |  |
| 1 M HCl                    | Water                      |   |    |    |    |    |    |    |   |    |    |    |    |    |    |    |    |    |    |    |    |   | x |  |
| 1 M HCl                    | Acetate                    |   |    |    |    |    |    |    |   |    |    |    |    |    |    |    |    |    |    |    |    |   | x |  |
| 1 M HCl                    | Ammonium acetate           |   |    |    |    |    |    |    |   |    | x  | x  |    |    |    |    |    |    |    |    |    |   | x |  |
| 1 M HCl                    | HNO <sub>3</sub> digestion |   |    |    |    |    |    |    |   |    |    |    |    |    |    |    |    |    |    |    |    |   | x |  |
| 1 M HCl                    | Truog                      | x | x  | x  | x  | x  | x  | x  | x | x  | x  | x  | x  | x  | x  | x  | x  | x  | x  | x  | x  | x | x |  |
| Water                      | 0.1 M HCl                  |   |    |    |    |    |    |    |   |    |    |    |    |    |    |    |    |    |    |    |    |   | x |  |
| Water                      | 1 M HCl                    |   |    |    |    |    |    |    |   |    |    |    |    |    |    |    |    |    |    |    |    |   | x |  |
| Water                      | Acetate                    |   |    |    |    |    |    |    |   |    |    |    |    |    |    |    |    |    |    |    |    |   |   |  |
| Water                      | Ammonium acetate           |   |    |    |    |    |    |    |   |    | x  | x  |    |    |    |    |    |    |    |    |    |   |   |  |
| Water                      | HNO <sub>3</sub> digestion |   |    |    |    |    |    |    |   |    |    |    |    |    |    |    |    |    |    |    |    |   |   |  |
| Water                      | Truog                      | x | x  | x  | x  | x  | x  | x  | x | x  | x  | x  | x  | x  | x  | x  | x  | x  | x  | x  | x  | x | x |  |
| Acetate                    | 0.1 M HCl                  |   |    |    |    |    |    |    |   |    |    |    |    |    |    |    |    |    |    |    |    |   | x |  |
| Acetate                    | 1 M HCl                    |   |    |    |    |    |    |    |   |    |    |    |    |    |    |    |    |    |    |    |    |   | x |  |
| Acetate                    | Water                      |   |    |    |    |    |    |    |   |    |    |    |    |    |    |    |    |    |    |    |    |   |   |  |
| Acetate                    | Ammonium acetate           |   |    |    |    |    |    |    |   |    | x  | x  |    |    |    |    |    |    |    |    |    |   |   |  |
| Acetate                    | HNO <sub>3</sub> digestion |   |    |    |    |    |    |    |   |    |    |    |    |    |    |    |    |    |    |    |    |   |   |  |
| Acetate                    | Truog                      | x | x  | x  | x  | x  | x  | x  | x | x  | x  | x  | x  | x  | x  | x  | x  | x  | x  | x  | x  | x | x |  |
| Ammonium acetate           | 0.1 M HCl                  |   |    |    |    |    |    |    |   |    |    |    |    |    |    |    |    |    |    |    |    |   | x |  |
| Ammonium acetate           | 1 M HCl                    |   |    |    |    |    |    |    |   |    | x  | x  |    |    |    |    |    |    |    |    |    |   | x |  |
| Ammonium acetate           | Water                      |   |    |    |    |    |    |    |   |    | x  | x  |    |    |    |    |    |    |    |    |    |   |   |  |
| Ammonium acetate           | Acetate                    |   |    |    |    |    |    |    |   |    | x  | x  |    |    |    |    |    |    |    |    |    |   |   |  |
| Ammonium acetate           | HNO <sub>3</sub> digestion |   |    |    |    |    |    |    |   |    | x  | x  |    |    |    |    |    |    |    |    |    |   |   |  |
| Ammonium acetate           | Truog                      | x | x  | x  | x  | x  | x  | x  | x | x  | x  | x  | x  | x  | x  | x  | x  | x  | x  | x  | x  | x | x |  |
| HNO <sub>3</sub> digestion | 0.1 M HCl                  |   |    |    |    |    |    |    |   |    |    |    |    |    |    |    |    |    |    |    |    |   | x |  |
| HNO <sub>3</sub> digestion | 1 M HCl                    |   |    |    |    |    |    |    |   |    |    |    |    |    |    |    |    |    |    |    |    |   | x |  |
| HNO <sub>3</sub> digestion | Water                      |   |    |    |    |    |    |    |   |    |    |    |    |    |    |    |    |    |    |    |    |   |   |  |
| HNO <sub>3</sub> digestion | Acetate                    |   |    |    |    |    |    |    |   |    |    |    |    |    |    |    |    |    |    |    |    |   |   |  |
| HNO <sub>3</sub> digestion | Ammonium acetate           |   |    |    |    |    |    |    |   |    | x  | x  |    |    |    |    |    |    |    |    |    |   |   |  |
| HNO <sub>3</sub> digestion | Truog                      | x | x  | x  | x  | x  | x  | x  | x | x  | x  | x  | x  | x  | x  | x  | x  | x  | x  | x  | x  | x | x |  |
| Truog                      | 0.1 M HCl                  | x | x  | x  | x  | x  | x  | x  | x | x  | x  | x  | x  | x  | x  | x  | x  | x  | x  | x  | x  | x | x |  |
| Truog                      | 1 M HCl                    | x | x  | x  | x  | x  | x  | x  | x | x  | x  | x  | x  | x  | x  | x  | x  | x  | x  | x  | x  | x | x |  |
| Truog                      | Water                      | x | x  | x  | x  | x  | x  | x  | x | x  | x  | x  | x  | x  | x  | x  | x  | x  | x  | x  | x  | x | x |  |
| Truog                      | Acetate                    | x | x  | x  | x  | x  | x  | x  | x | x  | x  | x  | x  | x  | x  | x  | x  | x  | x  | x  | x  | x | x |  |
| Truog                      | Ammonium acetate           | x | x  | x  | x  | x  | x  | x  | x | x  | x  | x  | x  | x  | x  | x  | x  | x  | x  | x  | x  | x | x |  |
| Truog                      | HNO <sub>3</sub> digestion | x | x  | x  | x  | x  | x  | x  | x | x  | x  | x  | x  | x  | x  | x  | x  | x  | x  | x  | x  | x | x |  |

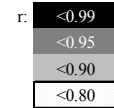

X: Not determined or Not detected
